# Supplementary material for: The Potential Protective Effect ofPhysalis peruvianaL. against Carbon Tetrachloride-Induced Hepatotoxicity in Rats Is Mediated by Suppression of Oxidative Stress and Downregulation of MMP-9 Expression
Source: Hindawi journal article supplement (doi:10.1155/2014/381413), 2014-01-01
Supplement: f1 [file 381413.f1.pdf]

**Table S1:** Phytochemicals compounds identified in *Physalis peruviana* juice by GC-MS.

| Peak | Retention time | Name of the compound                                                                      | Molecular formula                               | Molecular weight | Area % |
|------|----------------|-------------------------------------------------------------------------------------------|-------------------------------------------------|------------------|--------|
| 1    | 5.50 min       | Oleic acid, eicosyl ester                                                                 | C <sub>38</sub> H <sub>76</sub> O <sub>2</sub>  | 562              | 5.04   |
| 2    | 6.24 min       | Colchifoleine                                                                             | C <sub>21</sub> H <sub>23</sub> NO <sub>7</sub> | 401              | 1.48   |
| 3    | 6.40 min       | 3 $\beta$ ,11 $\beta$ ,21-Trihydroxy-20-oxo-5 $\alpha$ -pregnan-18-oic acid 18,11-lactone | C <sub>21</sub> H <sub>30</sub> O <sub>5</sub>  | 362              | 0.63   |

|           |           |                                                                                                      |                       |     |      |
|-----------|-----------|------------------------------------------------------------------------------------------------------|-----------------------|-----|------|
| <b>4</b>  | 9.12 min  | 1-Hydroxy-2-(2,3,4,6-tetra-O-acetyl-beta-D-glucopyranosyl)-9H-xanthene-3,6,7-triyl triacetate        | $C_{33}H_{34}O_{18}$  | 718 | 0.81 |
| <b>5</b>  | 9.18 min  | kaempferol 3-O-rutinoside                                                                            | $C_{27}H_{30}O_{15}$  | 594 | 1.40 |
| <b>6</b>  | 10.03 min | 3,12-DiketochoLANic acid                                                                             | $C_{24}H_{36}O_4$     | 388 | 2.58 |
| <b>7</b>  | 10.11 min | alpha-D-Glucopyranoside, methyl 2-(acetylamino)-2-deoxy-3-O-(trimethylsilyl)-, cyclic methylboronate | $C_{13}H_{26}BNO_6Si$ | 331 | 1.62 |
| <b>8</b>  | 13.67 min | ethyl iso-allocholate                                                                                | $C_{26}H_{44}O_5$     | 436 | 1.99 |
| <b>9</b>  | 13.83 min | Quercetin 3,4',7-trimethyl ether                                                                     | $C_{18}H_{16}O_7$     | 344 | 3.11 |
| <b>10</b> | 14.00 min | Folic Acid                                                                                           | $C_{19}H_{19}N_7O_6$  | 441 | 0.95 |
| <b>11</b> | 14.84 min | 1,25-Dihydroxyvitamin D2                                                                             | $C_{28}H_{44}O_3$     | 428 | 1.27 |
| <b>12</b> | 15.20 min | Docosane                                                                                             | $C_{22}H_{46}$        | 310 | 0.93 |
| <b>13</b> | 17.00 min | 3-Hydroxy-4,4-dimethyl-7-oxoandrost-5-en-17-yl acetate                                               | $C_{23}H_{34}O_4$     | 374 | 0.71 |
| <b>14</b> | 17.07 min | (5β)Pregnane-3,20β-diol, 14α,18α-[4-methyl-3-oxo-(1-oxa-4-azabutane-1,4-diyl)], diacetate            | $C_{28}H_{43}NO_6$    | 489 | 1.45 |
| <b>15</b> | 21.66 min | Pregna-4,6-diene-21-carboxylic acid, 17-hydroxy-3-oxo-, γ-lactone                                    | $C_{22}H_{28}O_3$     | 340 | 0.75 |
| <b>16</b> | 24.96 min | Hexadecatrienoic acid, methyl ester                                                                  | $C_{17}H_{28}O_2$     | 264 | 0.64 |

---

|           |            |                                                                        |                      |     |      |
|-----------|------------|------------------------------------------------------------------------|----------------------|-----|------|
| <b>17</b> | 25.43 min  | beta-k-strophanthin                                                    | $C_{36}H_{54}O_{14}$ | 710 | 2.48 |
| <b>18</b> | 27.07 min  | 2,2,4,9,11,11-Hexamethyl dodecane                                      | $C_{18}H_{38}$       | 254 | 0.66 |
| <b>19</b> | 28.24 min  | Cholest-5-en-3-one                                                     | $C_{27}H_{44}O$      | 384 | 0.63 |
| <b>20</b> | 29.35 min. | 9,12,15-Octadecatrienoic acid (2-phenyl-1,3-dioxolan-4-yl)methyl ester | $C_{28}H_{40}O_4$    | 440 | 0.89 |
| <b>21</b> | 31.34 min  | 9-cis-Hexadecenoic acid                                                | $C_{34}H_{64}O_2$    | 504 | 0.93 |
| <b>22</b> | 33.63 min  | 3,7,11-Trihydroxypregnan-20-one                                        | $C_{21}H_{34}O_4$    | 350 | 0.99 |
| <b>23</b> | 34.16 min  | Ceanothine C                                                           | $C_{26}H_{38}N_4O_4$ | 470 | 1.26 |
| <b>24</b> | 35.42 min  | Methyl-9,9,10,10-D4-octadecanoate                                      | $C_{19}H_{34}D_4O_2$ | 298 | 4.01 |
| <b>25</b> | 39.21 min  | Lucenin-2                                                              | $C_{27}H_{30}O_{16}$ | 610 | 1.50 |
| <b>26</b> | 39.73 min  | Betulin                                                                | $C_{30}H_{50}O_2$    | 442 | 0.62 |
| <b>27</b> | 47.70 min  | (5 $\alpha$ )Pregnane-3,20 $\alpha$ -diol                              | $C_{28}H_{43}NO_6$   | 489 | 0.97 |
| <b>28</b> | 48.35 min  | Anodendroside G, monoacetate                                           | $C_{32}H_{42}O_{11}$ | 602 | 0.64 |
| <b>29</b> | 54.18 min  | 7,8-Epoxy lanostan-11-ol, 3-acetoxy-                                   | $C_{32}H_{54}O_4$    | 502 | 0.61 |

---
